# Supplementary material for: LncRNA NEAT1 Silenced miR-133b Promotes Migration and Invasion of Breast Cancer Cells
Source: PubMed Central journal article supplement (PMC6695844; doi:10.3390/ijms20153616), 2019-07-24
Supplement: ijms-20-03616-s001.pdf [file ijms-20-03616-s001.pdf]

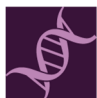

**Supplementary Table S1.** miR-133b expression and clinicopathological features in 40 patients with breast cancer.

| Characteristics                       | Expression of miR-133b |      | p value* |
|---------------------------------------|------------------------|------|----------|
|                                       | Low                    | High |          |
| <b>Sex</b>                            |                        |      |          |
| male                                  | 20                     | 20   |          |
| female                                | 0                      | 0    |          |
| <b>Age</b>                            |                        |      | 0.185    |
| ≤60                                   | 11                     | 15   |          |
| >60                                   | 9                      | 5    |          |
| <b>Grade</b>                          |                        |      | 0.125    |
| I /I-II, well-differentiated          | 4                      | 8    |          |
| II /II-III, moderately differentiated | 9                      | 10   |          |
| III, poorly differentiated            | 7                      | 2    |          |
| <b>Tumor histological</b>             |                        |      | 0.001*   |
| Ductal carcinoma in situ              | 1                      | 10   |          |
| Invasive ductal carcinoma             | 19                     | 10   |          |
| <b>T Classification</b>               |                        |      | 0.062    |
| T1                                    | 12                     | 5    |          |
| T2                                    | 7                      | 11   |          |
| T3                                    | 1                      | 4    |          |
| <b>N Classification</b>               |                        |      | 0.688    |
| N0                                    | 7                      | 6    |          |
| N1                                    | 3                      | 1    |          |
| N2                                    | 6                      | 8    |          |
| N3                                    | 4                      | 5    |          |
| <b>ER status</b>                      |                        |      | 0.206    |
| Negative                              | 12                     | 8    |          |
| Positive                              | 8                      | 12   |          |
| <b>PR status</b>                      |                        |      | 0.288    |
| Negative                              | 16                     | 13   |          |
| Positive                              | 4                      | 7    |          |
| <b>HER2 status</b>                    |                        |      | 0.736    |
| Negative                              | 6                      | 7    |          |
| Positive                              | 14                     | 13   |          |
| <b>Tumor size(cm<sup>3</sup>)</b>     |                        |      | 0.109    |
| ≤ 6                                   | 9                      | 14   |          |
| > 6                                   | 11                     | 6    |          |
| <b>Lymph node metastasis</b>          |                        |      | 0.008*   |
| Negative                              | 9                      | 17   |          |

Positive

11

3

---

Median expression level was used as a cutoff to divide the 40 patients into miR-133b low group ( $n = 20$ ) and miR-133b high group ( $n = 20$ ). Two-sided  $\chi^2$  test. \*  $p < 0.05$ .

**Supplementary Table S2.** Sequences of primers used for RT-qPCR and plasmid construction.

| <b>Primer Names</b>                                       | <b>Sequences</b>                   |
|-----------------------------------------------------------|------------------------------------|
| <b>Sequences of primers used for RT-qPCR</b>              |                                    |
| hsa-miR-133b forward                                      | 5'-CTCAGCTTTGGTCCCCTTCAAC-3'       |
| hsa-miR-133b reverse                                      | 5'-GTGCAGGGTCCGAGGT-3'             |
| U6 forward                                                | 5'-ATTGGAACGATACAGAGAAGATT-3'      |
| U6 reverse                                                | 5'-GGAACGCTTCACGAATTTG-3'          |
| TIMM17A forward                                           | 5'-TTGTGGATGACTGTGGTG-3'           |
| TIMM17A reverse                                           | 5'-CCAAAAGGTGAGGAAGGT -3'          |
| GAPDH forward                                             | 5'-GAGTCAACGGATTTGGTCGT-3'         |
| GAPDH reverse                                             | 5'-TTGATTTTGGAGGGATCTCG-3'         |
| NEAT1 forward                                             | 5'-TGGCTAGCTCAGGGCTTCAG-3'         |
| NEAT11 reverse                                            | 5'-TCTCCTTGCCAAGCTTCCTTC- 3'       |
| <b>Sequences of primers used for plasmid construction</b> |                                    |
| pcDNA3.1-TIMM17A forward                                  | 5'-CAGGAATTCTGGAGGAGTACGCGCGAG- 3' |
| pcDNA3.1-TIMM17A reverse                                  | 5'-GACCTCGAGCTACTGATATTGTCGATA- 3' |
| pcDNA3.1-NEAT1 forward                                    | 5'-CGCGGAGAGTTAGCGACAGGGAGGGAT-3'  |
| pcDNA3.1-NEAT1 reverse                                    | 5'-TGCTCTCTAATGAGTTTAGAACTCAAAC-3' |

**Supplementary Table S3.** Sequences of miR-133b mimics and inhibitor, and siRNAs.

| <b>RNA Names</b>   | <b>Sequences</b>                 |
|--------------------|----------------------------------|
| miR-133b mimics    | 5'-UUUGGUCCCCUUCAACCAGCUA-3'     |
| mimics NC          | 5'- UUCUCCGAACGUGUCACGUTT-3'     |
| miR-133b inhibitor | 5'-UAGCUGGUUGAAGGGGACCAAA-3'     |
| inhibitor NC       | 5'-CAGUACUUUUGUGUAGUACAA-3'      |
| NEAT1-siRNA-1      | 5'-GGTCTGTGTGGAAGGAGGAAGGCAG- 3' |
| NEAT1-siRNA-2      | 5'-GCCAUCAGCUUUGAAUAAAUU-3'      |
| NEAT1-siRNA-3      | 5'-GGUGUUAUCAAGUGAAUUAUU-3'      |
| TIMM17A-siRNA-1    | 5'-GCAUGAUGUUAGUAAUUACA-3'       |
| TIMM17A-siRNA-2    | 5'-GGCUAUAAGAGACAUUUAGC-3'       |
| TIMM17A-siRNA-3    | 5'-GAUGUUUCAUGCUCAUGUACU-3'      |

**Supplementary Table S4.** Antibodies used for western blotting (WB), RNA-binding protein immunoprecipitation (RIP) and flow cytometry (FC).

| <b>Protein</b> | <b>Applications</b> | <b>Antibody</b>                   | <b>Origin</b> | <b>Dilution</b> | <b>Molecular Weight</b> |
|----------------|---------------------|-----------------------------------|---------------|-----------------|-------------------------|
| GAPDH          | WB                  | D16H11, Cell Signaling Technology | Rabbit        | 1:1000          | 36 KD                   |
| TIMM17A        | WB, CHIP            | ab126044, Abcam                   | Rabbit        | 1:500           | 18KD                    |
| Ago2           | RIP                 | 03-110, Merck Millipore           | Mouse         | 1:10            | 100KD                   |
| GFP            | RIP                 | ab290, Abcam                      | Rabbit        | 1:20            | 28KD                    |

Supplementary Table S5. Screening of 111 predicted targets of miR-133b.

| No. | Gene Name | Breast Cancer Related | Migration or Invasion Related | Reported 133b-target | Expression in Tumor | Fold Change | p-Value  | Survival Related | p-Value  |
|-----|-----------|-----------------------|-------------------------------|----------------------|---------------------|-------------|----------|------------------|----------|
| 1   | TIMM17A   | √                     | √                             | ×                    | high                | 2.20        | 7.80E-79 | √                | 2.60E-15 |
| 2   | ELAVL1    | √                     | √                             | ×                    | high                | 1.53        | 9.60E-67 | √                | 0.007    |
| 3   | NDRG1     | √                     | √                             | ×                    | high                | 1.06        | 1.40E-05 | √                | 2.20E-09 |
| 4   | SOX4      | √                     | √                             | ×                    | high                | 1.75        | 5.90E-24 | ×                | 0.46     |
| 5   | PFN2      | √                     | √                             | ×                    | high                | 1.61        | 0.00061  | ×                | 0.12     |
| 6   | CTBP2     | √                     | √                             | ×                    | high                | 1.38        | 9.10E-10 | ×                | 0.48     |
| 7   | RAPH1     | √                     | √                             | ×                    | low                 | 0.86        | 0.00054  |                  |          |
| 8   | SGMS2     | √                     | √                             | ×                    | low                 | 0.76        | 2.00E-08 |                  |          |
| 9   | CRK       | √                     | √                             | ×                    | low                 | 0.75        | 2.10E-26 |                  |          |
| 10  | RBPJ      | √                     | √                             | ×                    | low                 | 0.74        | 4.70E-27 |                  |          |
| 11  | TCF7      | √                     | √                             | ×                    | low                 | 0.59        | 4.90E-16 |                  |          |
| 12  | MEIS1     | √                     | √                             | ×                    | low                 | 0.53        | 7.20E-34 |                  |          |
| 13  | GABARAPL1 | √                     | √                             | ×                    | low                 | 0.37        | 5.00E-86 |                  |          |
| 14  | SGK1      | √                     | √                             | ×                    | low                 | 0.37        | 1.40E-47 |                  |          |
| 15  | USP6      | √                     | √                             | ×                    | low                 | 0.36        | 1.10E-30 |                  |          |
| 16  | PFKFB3    | √                     | √                             | ×                    | low                 | 0.29        | 3.70     |                  |          |
| 17  | AKAP9     | √                     | √                             | ×                    |                     | 1.13        | 0.99     |                  |          |
| 18  | NUP153    | √                     | √                             | ×                    |                     | 1.02        | 0.30     |                  |          |
| 19  | SP3       | √                     | √                             | ×                    |                     | 1.00        | 0.58     |                  |          |
| 20  | YES1      | √                     | √                             | ×                    |                     | 0.99        | 0.014    |                  |          |
| 21  | MAML1     | √                     | √                             | √                    |                     |             |          |                  |          |
| 22  | FGFR1     | √                     | √                             | √                    |                     |             |          |                  |          |
| 23  | MCL1      | √                     | √                             | √                    |                     |             |          |                  |          |
| 24  | LASP1     | √                     | √                             | √                    |                     |             |          |                  |          |
| 25  | BCL2L2    | √                     | √                             | √                    |                     |             |          |                  |          |
| 26  | DUSP1     | √                     | √                             | √                    |                     |             |          |                  |          |
| 27  | MEIS2     | √                     | ×                             |                      |                     |             |          |                  |          |
| 28  | UBA2      | √                     | ×                             |                      |                     |             |          |                  |          |
| 29  | BNIP3L    | √                     | ×                             |                      |                     |             |          |                  |          |
| 30  | PREX1     | √                     | ×                             |                      |                     |             |          |                  |          |
| 31  | PTPRD     | √                     | ×                             |                      |                     |             |          |                  |          |
| 32  | POU4F1    | √                     | ×                             |                      |                     |             |          |                  |          |

|    |         |   |   |
|----|---------|---|---|
| 33 | ATP6AP2 | √ | × |
| 34 | FTL     | √ | × |
| 35 | RARB    | √ | × |
| 36 | TRHDE   | √ | × |
| 37 | MAP3K3  | √ | × |
| 38 | PPP2CA  | √ | × |
| 39 | SH3GL2  | √ | × |
| 40 | AFAP1   | √ | × |
| 41 | USP32   | √ | × |
| 42 | SMARCD1 | √ | × |
| 43 | MECOM   | √ | × |
| 44 | RB1CC1  | √ | × |
| 45 | SV2A    | √ | × |
| 46 | SLC7A8  | √ | × |
| 47 | SUMO1   | √ | × |
| 48 | QKI     | √ | × |
| 49 | VAPB    | √ | × |
| 50 | FOXL2   | √ | × |
| 51 | SEPHS2  | √ | × |
| 52 | TBPL1   | √ | × |
| 53 | PPP2CB  | √ | × |
| 54 | CMPK1   | √ | × |
| 55 | TFE3    | √ | × |
| 56 | SESN1   | √ | × |
| 57 | EPHA7   | √ | × |
| 58 | UBE2Q1  | √ | × |
| 59 | PEX5L   | × |   |
| 60 | AFTPH   | × |   |
| 61 | BTBD3   | × |   |
| 62 | PAN3    | × |   |
| 63 | ARFIP2  | × |   |
| 64 | VPS54   | × |   |
| 65 | ZC3H14  | × |   |
| 66 | ADCYAP1 | × |   |
| 67 | ARHGDI1 | × |   |
| 68 | PRRT2   | × |   |
| 69 | JAZF1   | × |   |

|     |          |   |
|-----|----------|---|
| 70  | DOLPP1   | × |
| 71  | ZNF436   | × |
| 72  | CCDC117  | × |
| 73  | FAM117B  | × |
| 74  | GARNL3   | × |
| 75  | GPM6A    | × |
| 76  | EXD2     | × |
| 77  | GABPB2   | × |
| 78  | SUPT16H  | × |
| 79  | STX5     | × |
| 80  | ANKRD12  | × |
| 81  | CLTA     | × |
| 82  | SOBP     | × |
| 83  | SACM1L   | × |
| 84  | FBXL2    | × |
| 85  | MED12L   | × |
| 86  | TMOD3    | × |
| 87  | CDK13    | × |
| 88  | XPO4     | × |
| 89  | PPFIA3   | × |
| 90  | ARHGAP12 | × |
| 91  | ZNF362   | × |
| 92  | GRM5     | × |
| 93  | TRAM2    | × |
| 94  | TMEM167A | × |
| 95  | RAP2C    | × |
| 96  | PTBP2    | × |
| 97  | SLC6A1   | × |
| 98  | FBXW11   | × |
| 99  | GDI2     | × |
| 100 | RAVER1   | × |
| 101 | NRIP3    | × |
| 102 | SEC61B   | × |
| 103 | SYT1     | × |
| 104 | MLLT3    | × |
| 105 | CRTAM    | × |
| 106 | RBMXL1   | × |



---

|     |        |   |
|-----|--------|---|
| 107 | LRRC7  | × |
| 108 | TFAP2D | × |
| 109 | SHISA5 | × |
| 110 | SNRK   | × |
| 111 | MTMR4  | × |

---

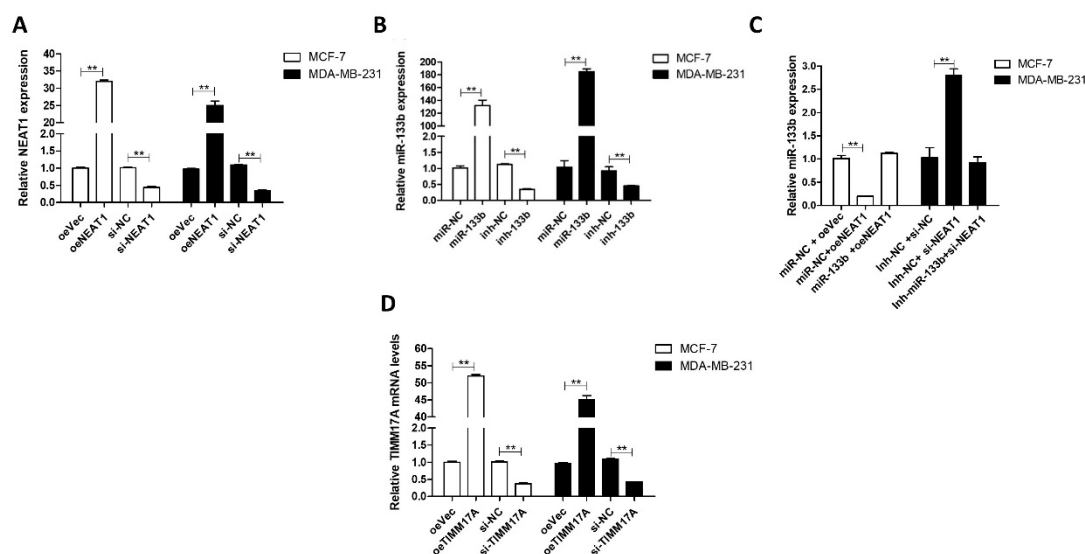

**Figure S1.** Verification of miR-133b, NEAT1 and TIMM17A overexpression or knockdown efficiencies in breast cancer cells. (A) NEAT1 levels in MCF-7 cells and MDA-MB-231 cells transfected with oeVec, oeNEAT1, si-NC or si-NEAT1. (B) miR-133b levels in MCF-7 cells and MDA-MB-231 cells transfected with miR-NC, miR-133b, inh-NC or inh-miR-133b. (C) miR-133b levels in MCF-7 cells transfected with miR-NC plus oeVec, miR-NC plus oeNEAT1, or miR-133b plus oeNEAT1, and MDA-MB-231 cells transfected with inh-NC plus si-NC, inh-NC plus si-NEAT1, or inh-miR-133b plus si-NEAT1. (D) TIMM17A mRNA levels in MCF-7 cells and MDA-MB-231 cells transfected with oeVec, oeTIMM17A, si-NC or si-TIMM17A. \*\* $p < 0.01$ ; \*\*\* $p < 0.001$ .

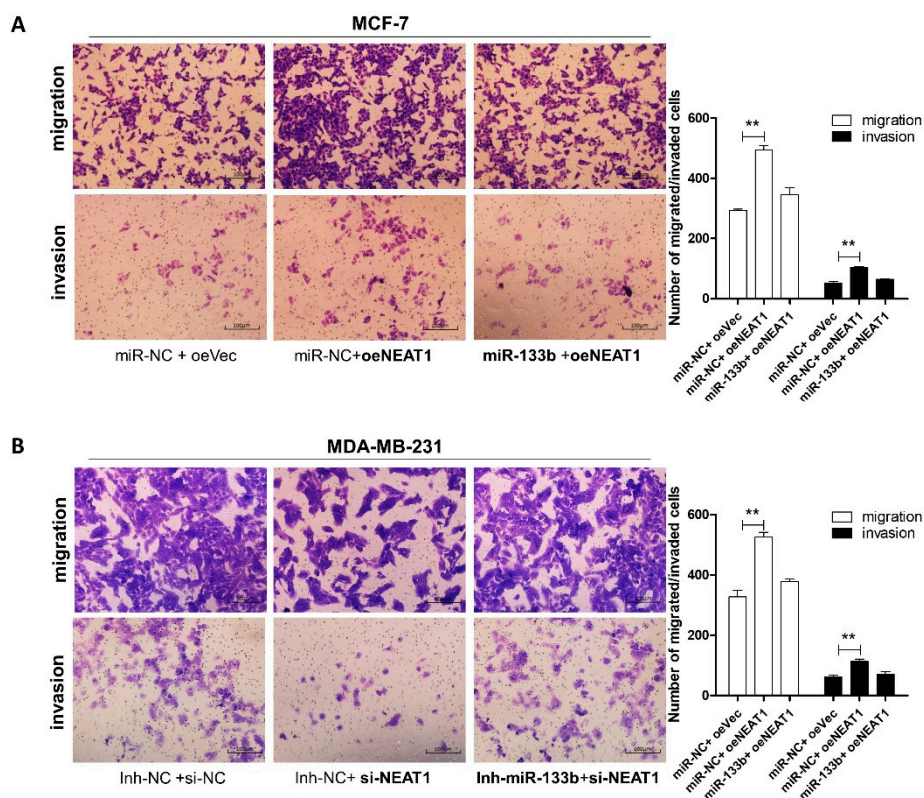

**Figure S2.** NEAT1 promotes breast cancer cells migration and invasion via silencing miR-133b. (A,B) Migration and invasion of MCF-7 cells transfected with miR-NC plus oeVec, miR-NC plus oeNEAT1,

or miR-133b plus oeNEAT1 (A), and MDA-MB-231 cells transfected with inh-NC plus si-NC, inh-NC plus si-NEAT1, or inh-miR-133b plus si-NEAT1 (B) detected by transwell assay. Scale bar, 100  $\mu$ m.

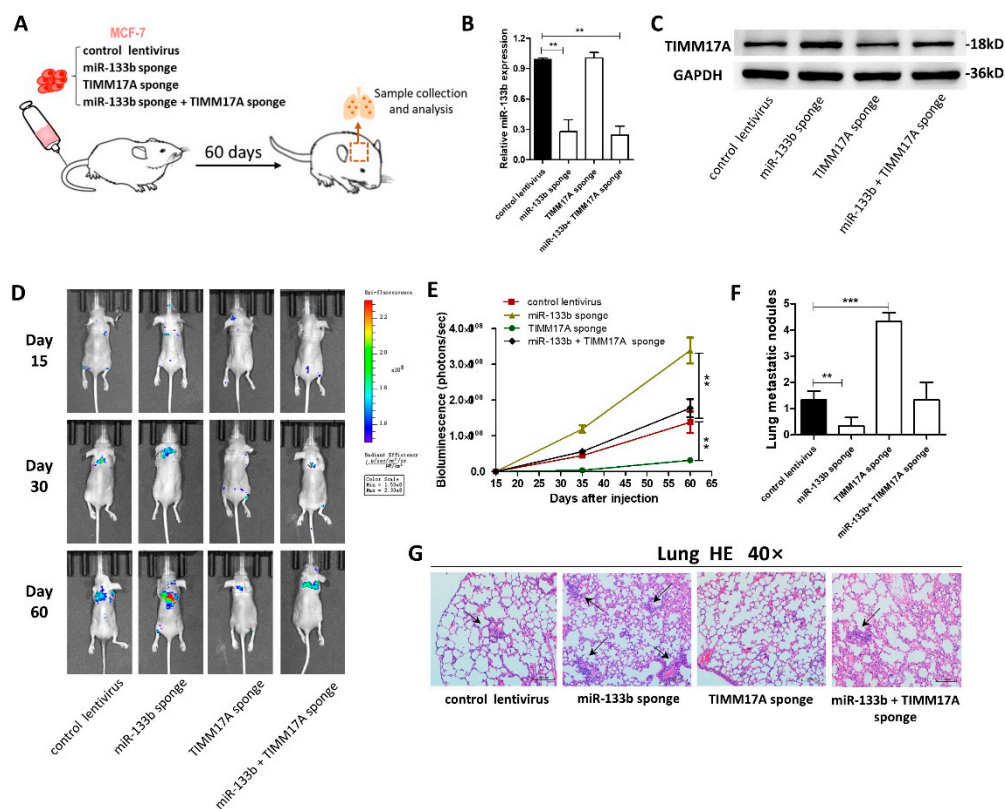

**Figure S3.** Effects of TIMM17A-targeted miR-133b on the lung colonization of MCF-7 cells xenografts in mice. (A) Experimental design: immunocompromised mice were injected through tail vein with MCF-7 cells transfected with either the control lentivirus, miR-133b sponge, TIMM17A sponge, miR-133b sponge plus TIMM17A sponge. (B,C) miR-133b levels (B) and TIMM17A protein levels (C) in MCF-7 cells transfected with either the control lentivirus, miR-133b sponge, TIMM17A sponge, miR-133b sponge plus TIMM17A sponge. (D,E) Representative BLI images (D) and quantitative analysis of the fluorescence intensities (E) of mice of five groups. The BLI was performed on days 15, 35, and 60 after injection. The intensity of BLI is represented by the color. (F,G) Numbers of metastatic nodules (F) and representative H&E-stained sections of lung tissues isolated from the intravenously injected mice. Black arrows indicate metastatic nodules. Scale bar, 200  $\mu$ m. \*\* $p < 0.01$ ; \*\*\* $p < 0.001$ .
